# Supplementary material
Source: Research Square preprint supplement (doi:10.21203/rs.3.rs-8938653/v1)
Supplement: Supplementary file 1 [file 075844a8d63e1f1edac755c7.docx]

**Supplementary file 1**


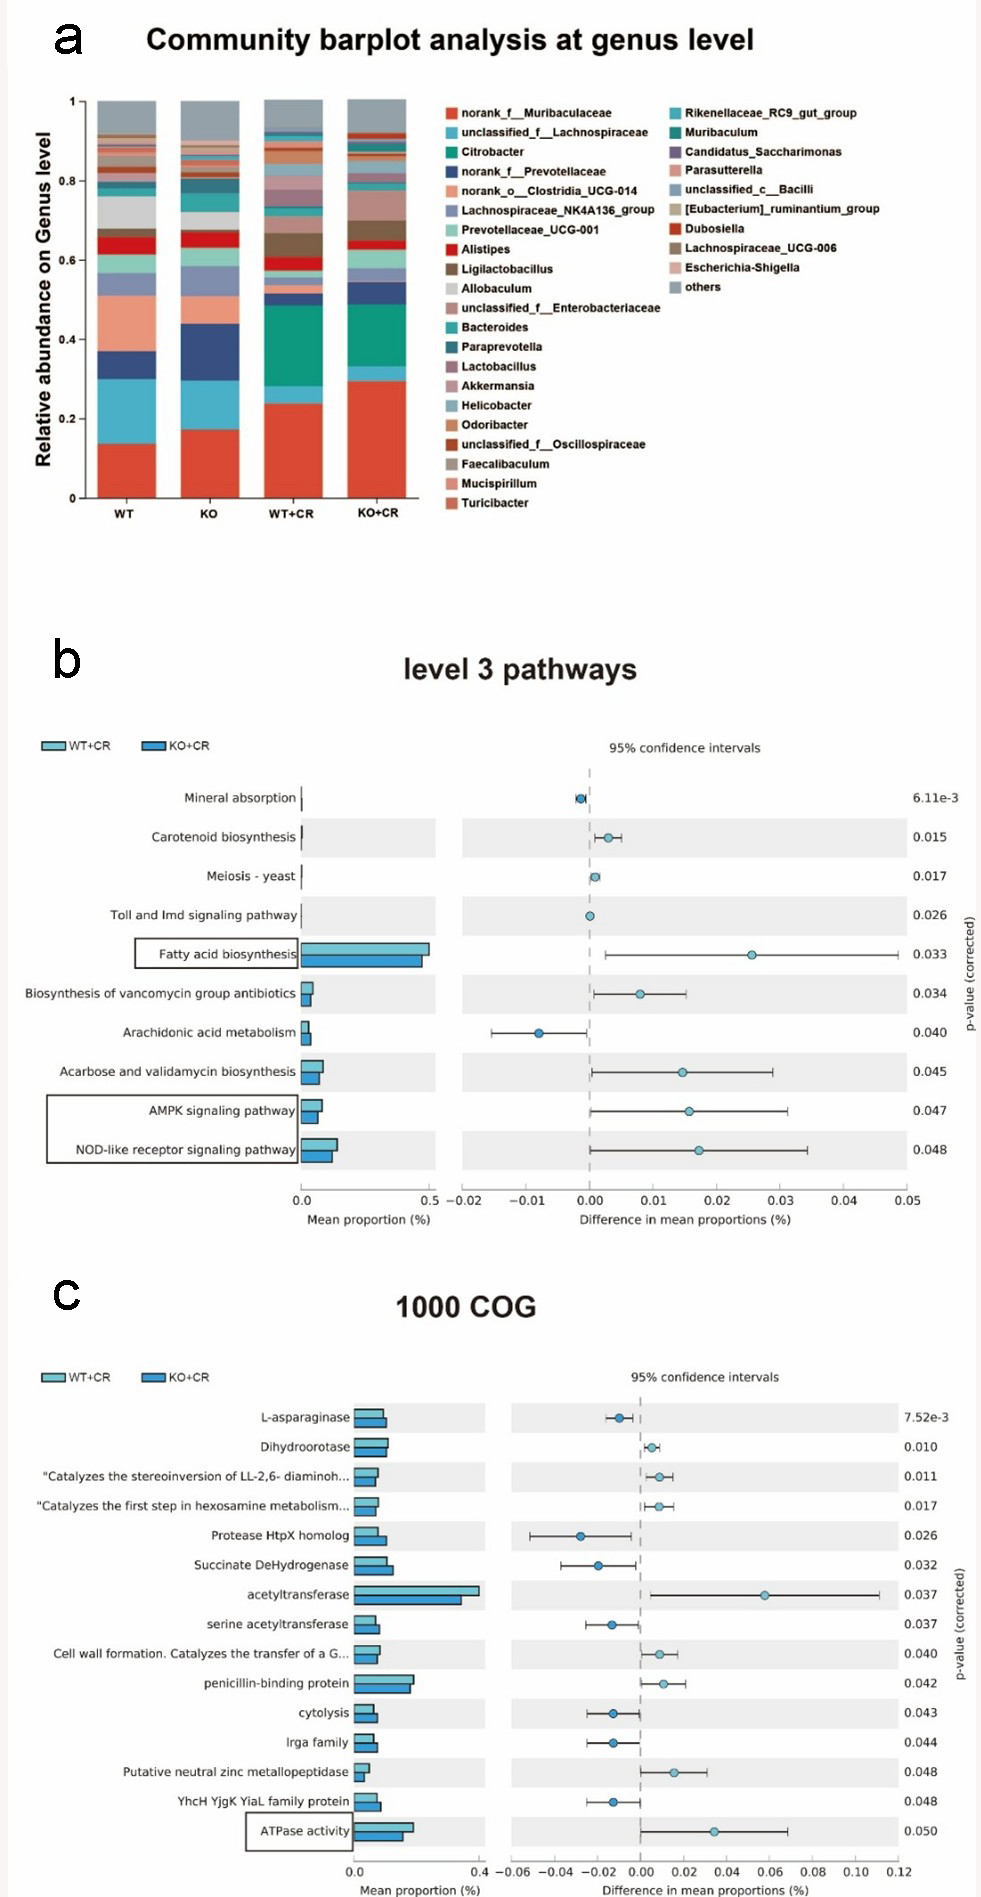


**Fig. S1** (a) Bacterial composition at genus level; (b-c) Prediction of 16S rRNA gene function based on KEGG at level 3 (b) and the most abundant 1000 COG functions (c). WT (healthy control); WT: wild type; WT+CR: *C. rodentium*-induced WT colitis; KO: ATPIF1−/−; KO+CR: *C. rodentium*-induced ATPIF1−/− colitis.

| **Table S1.** Primer sequences in RT-qPCRItems | Forward primer (5'-3') | Reverse primer (5'-3') |
| --- | --- | --- |
| *TNF-α* | CCCTCACACTCAGATCATCTTCT | GCTACGACGTGGGCTACAG |
| *IL-1β* | GCAACTGTTCCTGAACTCAACT | ATCTTTTGGGGTCCGTCAACT |
| *IL-6* | TAGTCCTTCCTACCCCAATTTCC | TTGGTCCTTAGCCACTCCTTC |
| *ZO-1* | GCCGCTAAGAGCACAGCAA | GCCCTCCTTTTAACACATCAGA |
| *GAPDH* | TCTGGAAAGCTGTGGCGTGAT | TCTGGAAAGCTGTGGCGTGAT |
